# Supplementary material for: Maximum Apparent Temperature Lowers Birth Weight And Increase Hazards Of Preterm Birth In A Constant High Ambient Temperature Exposed Population In Piura, Peru
Source: Research Square preprint supplement (doi:10.21203/rs.3.rs-1432107/v1), 2022-03-11
Supplement: Supplementary file 1 [file 9f7aab9da0bffef0bf39d9f8.docx]

| **Supplementary Table 2.** Cox regression analysis between preterm birth and HImax | | | | | | | | | | | | | |
| --- | --- | --- | --- | --- | --- | --- | --- | --- | --- | --- | --- | --- | --- |
|  |  |  |  |  |  |  |  |  | | |  | | |
| **Variable** | | **Entire pregnancy** | | | **Third trimester** | | | **Second trimester** | | | **First trimester** | | |
| **HR** | **95%CI** | **p** | **HR** | **95%CI** | **p** | **HR** | **95%CI** | **p** | **HR** | **95%CI** | **p** |
| HImax | |  |  |  |  |  |  |  |  |  |  |  |  |
|  | Q1 | Ref. |  |  | Ref. |  |  | Ref. |  |  | Ref. |  |  |
|  | Q2 | 0.93 | 0.79 , 1.09 | 0.352 | 1.01 | 0.86 , 1.18 | 0.912 | 1.36 | 1.16 , 1.59 | <0.001 | 0.90 | 0.77 , 1.06 | 0.218 |
|  | Q3 | 1.11 | 0.95 , 1.29 | 0.176 | 0.96 | 0.82 , 1.12 | 0.595 | 1.13 | 0.96 , 1.33 | 0.134 | 1.24 | 1.07 , 1.44 | 0.005 |
|  | Q4 | 0.97 | 0.83 , 1.15 | 0.735 | 1.09 | 0.93 , 1.28 | 0.303 | 1.36 | 1.16 , 1.61 | <0.001 | 1.17 | 1.00 , 1.38 | 0.053 |
|  | P95 | 1.93 | 1.58 , 2.37 | <0.001 | 2.76 | 2.30 , 3.31 | <0.001 | 1.47 | 1.16 , 1.86 | 0.001 | 1.76 | 1.42 , 2.18 | <0.001 |
|  |  |  |  |  |  |  |  |  |  |  |  |  |  |
| Mother age | | 1.01 | 1.01 , 1.02 | 0.001 | 1.01 | 1.00 , 1.02 | 0.002 | 1.01 | 1.01 , 1.02 | 0.001 | 1.01 | 1.01 , 1.02 | 0.001 |
|  |  |  |  |  |  |  |  |  |  |  |  |  |  |
| Work status | |  |  |  |  |  |  |  |  |  |  |  |  |
|  | Unemployed | Ref. |  |  | Ref. |  |  | Ref. |  |  | Ref. |  |  |
|  | Employed | 0.90 | 0.67 , 1.63 | 0.490 | 0.86 | 0.64 , 1.18 | 0.358 | 0.90 | 0.67 , 1.20 | 0.469 | 0.90 | 0.97 , 1.21 | 0.498 |
|  |  |  |  |  |  |  |  |  |  |  |  |  |  |
| Study level | |  |  |  |  |  |  |  |  |  |  |  |  |
|  | No studies | Ref. |  |  | Ref. |  |  | Ref. |  |  | Ref. |  |  |
|  | Elementary | 1.11 | 0.76 , 1.62 | 0.587 | 1.06 | 0.72 , 1.55 | 0.764 | 1.11 | 0.76 , 1.63 | 0.573 | 1.10 | 0.75 , 1.61 | 0.614 |
|  | Secondary | 0.95 | 0.66 , 1.38 | 0.799 | 0.89 | 0.62 , 1.30 | 0.559 | 0.95 | 0.66 , 1.39 | 0.808 | 0.94 | 0.65 , 1.37 | 0.770 |
|  | Higher education | 0.86 | 0.58 , 1.26 | 0.440 | 0.83 | 0.56 , 1.22 | 0.345 | 0.87 | 0.59 , 1.27 | 0.468 | 0.85 | 0.58 , 1.25 | 0.409 |
|  |  |  |  |  |  |  |  |  |  |  |  |  |  |
| Pregestational BMI | | 0.98 | 0.97 , 0.99 | 0.007 | 0.98 | 0.97 , 0.99 | 0.008 | 0.98 | 0.97 , 0.99 | 0.006 | 0.98 | 0.97 , 0.99 | 0.007 |
|  |  |  |  |  |  |  |  |  |  |  |  |  |  |
| Preeclam-psia | |  |  |  |  |  |  |  |  |  |  |  |  |
|  | No | Ref. |  |  | Ref. |  |  | Ref. |  |  | Ref. |  |  |
|  | Yes | 2.04 | 1.75 , 2.39 | <0.001 | 2.19 | 1.87 , 2.57 | <0.001 | 2.03 | 1.73 , 2.37 | <0.001 | 2.03 | 1.73 , 2.37 | <0.001 |
|  |  |  |  |  |  |  |  |  |  |  |  |  |  |
| Urinary tract infection | |  |  |  |  |  |  |  |  |  |  |  |  |
|  | No | Ref. |  |  | Ref. |  |  | Ref. |  |  | Ref. |  |  |
|  | Yes | 1.00 | 0.82 , 1.23 | 0.975 | 1.03 | 0.83 , 1.26 | 0.813 | 0.99 | 0.82 , 1.23 | 0.999 | 1.01 | 0.83 , 1.24 | 0.907 |
|  |  |  |  |  |  |  |  |  |  |  |  |  |  |
| Gestational diabetes | |  |  |  |  |  |  |  |  |  |  |  |  |
|  | No | Ref. |  |  | Ref. |  |  | Ref. |  |  | Ref. |  |  |
|  | Yes | 4.24 | 2.65 , 6.78 | <0.001 | 4.60 | 2.88 , 7.35 | <0.001 | 4.31 | 2.70 , 6.90 | <0.001 | 4.28 | 2.68 , 6.84 | <0.001 |
|  |  |  |  |  |  |  |  |  |  |  |  |  |  |
| Smoking | |  |  |  |  |  |  |  |  |  |  |  |  |
|  | No | Ref. |  |  | Ref. |  |  | Ref. |  |  | Ref. |  |  |
|  | Yes | 1.11 | 0.87 , 1.42 | 0.418 | 1.10 | 0.86 , 1.42 | 0.431 | 1.08 | 0.85 , 1.39 | 0.513 | 1.09 | 0.85 , 1.39 | 0.477 |
|  |  |  |  |  |  |  |  |  |  |  |  |  |  |
| Newborn sex | |  |  |  |  |  |  |  |  |  |  |  |  |
|  | Masculine | Ref. |  |  | Ref. |  |  | Ref. |  |  | Ref. |  |  |
|  | Feminine | 1.11 | 1.00 , 1.24 | 0.046 | 1.11 | 0.99 , 1.23 | 0.057 | 1.11 | 1.00 , 1.24 | 0.048 | 1.11 | 1.00 , 1.23 | 0.049 |
| Cox regression models adjusted for maternal age, employment status, educational level, pregestational BMI, preeclampsia, UTI, gestational diabetes, smoking and sex of the newborn. | | | | | | | | | | | | | |
| HR: Hazard Ratio. | | | | | | | | | | | | | |
